# Supplementary material for: Effect of Reducing Pigmentation by Collagen Peptide Intake: A Randomized, Double-Blind, Placebo-Controlled Study
Source: Springer Nature journal article supplement (doi:10.1007/s13555-022-00748-4), 2022-06-11
Supplement: MOESM1 [file 23156280]

## Effect of Reducing Pigmentation by Collagen Peptide Intake: A Randomized, Double-Blind, Placebo-Controlled Study

Ai Himeno <sup>1\*</sup>, Masaya Tsujikami <sup>1</sup>, Seiko Koizumi <sup>1</sup>, Toshiro Watanabe <sup>2</sup>, Michiya Igase <sup>3</sup>

<sup>1</sup> Nitta Gelatin Inc., Osaka, Japan; [a-himeno@nitta-gelatin.co.jp](mailto:a-himeno@nitta-gelatin.co.jp), [ma-tsujikami@nitta-gelatin.co.jp](mailto:ma-tsujikami@nitta-gelatin.co.jp), [se-koizumi@nitta-gelatin.co.jp](mailto:se-koizumi@nitta-gelatin.co.jp)

<sup>2</sup> Sonoda Women's University, Hyogo, Japan; [watnb-ts@sonoda-u.ac.jp](mailto:watnb-ts@sonoda-u.ac.jp)

<sup>3</sup> Department of Anti-aging Medicine, Ehime University Graduate School of Medicine, Ehime, Japan; [migase@m.ehime-u.ac.jp](mailto:migase@m.ehime-u.ac.jp)

\*Correspondence: [a-himeno@nitta-gelatin.co.jp](mailto:a-himeno@nitta-gelatin.co.jp); Tel.: +81-72-948-8252 (A.H.); Nitta Gelatin Inc. R&D center 2-22, Futamata, Yao-city, Osaka, Japan

Supplementary Material 1. Participant background

|           |                   | All age     |    |             |    | Aged under 55 years |   |             |   |
|-----------|-------------------|-------------|----|-------------|----|---------------------|---|-------------|---|
|           |                   | Baseline    |    | 3 months    |    | Baseline            |   | 3 months    |   |
| CP group  | Number            | 14          |    | 12          |    | 14                  |   | 12          |   |
|           | Sex (male/female) | 13/1        |    | 11/1        |    | 13/1                |   | 11/1        |   |
|           | Age (years old)   | 41.4 ± 8.8  | *  | 40.6 ± 9    | *  | 41.4 ± 8.8          |   | 40.6 ± 9    |   |
|           | Oil content       | 19.6 ± 16.4 |    | 13.2 ± 7.7  |    | 19.6 ± 16.4         |   | 16.6 ± 10.4 |   |
|           | Water content     | 61.1 ± 14.7 | #  | 53.5 ± 8.4  | #  | 61.1 ± 14.7         | # | 53.5 ± 8.4  | # |
| FCP group | Number            | 15          |    | 13          |    | 13                  |   | 11          |   |
|           | Sex (male/female) | 13/2        |    | 12/1        |    | 11/2                |   | 10/1        |   |
|           | Age (years old)   | 46.3 ± 8.4  |    | 46.8 ± 8.9  |    | 44.5 ± 7.7          |   | 44.8 ± 8.2  |   |
|           | Oil content       | 25.2 ± 15.2 |    | 15.5 ± 9.9  |    | 24.0 ± 14.3         |   | 13.2 ± 7.7  |   |
|           | Water content     | 66.1 ± 10.2 | #  | 52.8 ± 16.0 | #  | 67.0 ± 10.5         | # | 55.7 ± 14.8 | # |
| PL group  | Number            | 15          |    | 13          |    | 12                  |   | 10          |   |
|           | Sex (male/female) | 10/5        |    | 10/3        |    | 8/4                 |   | 8/2         |   |
|           | Age (years old)   | 49.9 ± 8    |    | 51.5 ± 7.7  |    | 47.3 ± 6.7          |   | 48.8 ± 6.6  |   |
|           | Oil content       | 15.5 ± 7.8  |    | 15.2 ± 14.5 |    | 16.4 ± 7.9          |   | 18.3 ± 15.2 |   |
|           | Water content     | 59.6 ± 8.8  | ## | 47.6 ± 12.5 | ## | 59.5 ± 9.2          | # | 48.4 ± 13.4 | # |

Mean ± standard deviation

Intergroup comparison: Tukey test by analysis of variance, \* P < 0.05, \*\* P < 0.01 (vs. PL group)

Intragroup comparison: Wilcoxon signed-rank test, # P < 0.05, ## P < 0.01 (vs. baseline)

CP, collagen peptide; FCP, fermented collagen peptide; PL, placebo

Supplementary Material 2. Improved skin pigmentation and redness by CP or FCP supplementation

| CP group          |                         | N                       | Baseline   | N             | 1 month     | N             | 2 months   | N             | 3 months   |               |
|-------------------|-------------------------|-------------------------|------------|---------------|-------------|---------------|------------|---------------|------------|---------------|
| Pigmented macules | Number                  | 14                      | 232 ± 75   | 14            | 203 ± 56    | 13            | 227 ± 58   | 12            | 233 ± 92   |               |
|                   | Area (mm <sup>2</sup> ) | 14                      | 18.0 ± 6.8 | 14            | 18.4 ± 7.4  | 13            | 21.8 ± 7.2 | 12            | 21.5 ± 8.3 |               |
| Pigmented patches | Lv1                     | Number                  | 14         | 64.6 ± 38.1   | 14          | 64.8 ± 33.0   | 13         | 71.2 ± 38.4   | 12         | 65.8 ± 36.1   |
|                   |                         | Area (mm <sup>2</sup> ) | 14         | 203.1 ± 114.7 | 14          | 174.9 ± 123.4 | 13         | 166.5 ± 91.4  | 12         | 163.1 ± 111.4 |
|                   | Lv2                     | Number                  | 14         | 13.1 ± 7.9    | 14          | 9.1 ± 7.0     | 13         | 10.8 ± 7.3    | 12         | 11.1 ± 7.3    |
|                   |                         | Area (mm <sup>2</sup> ) | 14         | 61.4 ± 63.6   | 14          | 28.1 ± 25.2   | 13         | 32.2 ± 22.2   | 12         | 29.5 ± 21.8   |
|                   | Lv3                     | Number                  | 14         | 4.8 ± 3.9     | 14          | 2.1 ± 2.4     | 13         | 2.8 ± 2.2     | 12         | 2.7 ± 2.0     |
|                   |                         | Area (mm <sup>2</sup> ) | 14         | 30.4 ± 47.5   | 14          | 4.9 ± 4.9     | 13         | 8.2 ± 7.4     | 12         | 6.3 ± 5.6     |
| Redness           | Lv3                     | Number                  | 14         | 3.9 ± 6.3     | 14          | 3.2 ± 8.1     | 13         | 2.7 ± 3.4     | 12         | 1.9 ± 4.5     |
|                   |                         | Area (mm <sup>2</sup> ) | 14         | 1.5 ± 2.5     | 14          | 0.8 ± 1.6     | 13         | 1.1 ± 2.4     | 12         | 0.4 ± 1.1     |
| FCP group         |                         | N                       | Baseline   | N             | 1 month     | N             | 2 months   | N             | 3 months   |               |
| Pigmented macules | Number                  | 15                      | 20.1 ± 6.4 | 15            | 18.2 ± 6.8  | 15            | 16.7 ± 5.4 | 13            | 18.2 ± 8.6 |               |
|                   | Area (mm <sup>2</sup> ) | 15                      | 17.5 ± 4.8 | 15            | 15.1 ± 5.4  | 15            | 15.2 ± 5.3 | 13            | 15.0 ± 5.8 |               |
| Pigmented patches | Lv1                     | Number                  | 15         | 48.6 ± 15.8   | 15          | 45.3 ± 18.4   | 15         | 42.1 ± 12.9   | 13         | 45.5 ± 16.2   |
|                   |                         | Area (mm <sup>2</sup> ) | 15         | 148.6 ± 92.1  | 15          | 134.3 ± 101.1 | 15         | 111.5 ± 65.1  | 13         | 104.8 ± 70.6  |
|                   | Lv2                     | Number                  | 15         | 8.5 ± 6.7     | 15          | 6.7 ± 6.2     | 15         | 5.8 ± 4.9     | 13         | 5.9 ± 3.7     |
|                   |                         | Area (mm <sup>2</sup> ) | 15         | 26.3 ± 28.9   | 15          | 27.7 ± 51.5   | 15         | 17.3 ± 20.6   | 13         | 20.0 ± 25.1   |
|                   | Lv3                     | Number                  | 15         | 3.5 ± 3.8     | 15          | 2.3 ± 2.8     | 15         | 1.3 ± 2.0     | 13         | 2.5 ± 2.4     |
|                   |                         | Area (mm <sup>2</sup> ) | 15         | 9.2 ± 10.8    | 15          | 9.6 ± 19.2    | 15         | 4.8 ± 7.8     | 13         | 7.7 ± 8.5     |
| Redness           | Lv3                     | Number                  | 15         | 0.9 ± 1.3     | 15          | 2.0 ± 2.7     | 15         | 2.1 ± 2.7     | 13         | 0.8 ± 1.2     |
|                   |                         | Area (mm <sup>2</sup> ) | 15         | 0.7 ± 1.1     | 15          | 0.2 ± 0.4     | 15         | 1.9 ± 3.9     | 13         | 0.9 ± 2.0     |
| PL group          |                         | N                       | Baseline   | N             | 1 month     | N             | 2 months   | N             | 3 months   |               |
| Pigmented macules | Number                  | 15                      | 20.0 ± 9.4 | 15            | 20.2 ± 10.1 | 15            | 17.6 ± 8.7 | 13            | 21.8 ± 8.6 |               |
|                   | Area (mm <sup>2</sup> ) | 15                      | 16.6 ± 7.7 | 15            | 15.7 ± 6.7  | 15            | 15.3 ± 5.8 | 13            | 15.7 ± 7.5 |               |
| Pigmented patches | Lv1                     | Number                  | 15         | 51.7 ± 24.6   | 15          | 60.8 ± 30.7   | 15         | 57.7 ± 27.6   | 13         | 59.3 ± 20.9   |
|                   |                         | Area (mm <sup>2</sup> ) | 15         | 135.6 ± 89.9  | 15          | 157.0 ± 107.2 | 15         | 149.7 ± 128.8 | 13         | 229.8 ± 282.7 |
|                   | Lv2                     | Number                  | 15         | 9.9 ± 5.6     | 15          | 9.1 ± 6.7     | 15         | 8.3 ± 6.1     | 13         | 11.0 ± 7.8    |
|                   |                         | Area (mm <sup>2</sup> ) | 15         | 34.9 ± 33.9   | 15          | 29.9 ± 28.7   | 15         | 35.9 ± 45.0   | 13         | 85.4 ± 185.7  |
|                   | Lv3                     | Number                  | 15         | 4.3 ± 2.3     | 15          | 2.9 ± 2.2     | 15         | 2.7 ± 1.8     | 13         | 5.2 ± 4.5     |
|                   |                         | Area (mm <sup>2</sup> ) | 15         | 10.0 ± 9.5    | 15          | 5.7 ± 4.7     | 15         | 7.9 ± 9.8     | 13         | 30.4 ± 75.4   |
| Redness           | Lv3                     | Number                  | 15         | 2.7 ± 3.7     | 15          | 3.8 ± 7.3     | 15         | 4.7 ± 7.1     | 13         | 2.4 ± 3.3     |
|                   |                         | Area (mm <sup>2</sup> ) | 15         | 1.9 ± 3.5     | 15          | 0.7 ± 2.2     | 15         | 1.2 ± 2.4     | 13         | 1.8 ± 3.7     |

Mean  $\pm$  standard deviation

Intergroup comparison: Tukey test by analysis of variance, \*  $P < 0.05$ , \*\*  $P < 0.01$  (vs. PL group)

Intragroup comparison: Wilcoxon signed-rank test, #  $P < 0.05$ , ##  $P < 0.01$  (vs. baseline)

CP, collagen peptide; FCP, fermented collagen peptide; PL, placebo

Supplementary Material 3. Improved skin pigmentation and redness by CP or FCP supplementation (below 55 years of age)

| CP under 55 years old      |                         | N                       | Baseline   | N             | 1 month       | N             | 2 months      | N             | 3 months      |                |
|----------------------------|-------------------------|-------------------------|------------|---------------|---------------|---------------|---------------|---------------|---------------|----------------|
| Pigmented macules          | Number                  | 14                      | 232 ± 7.5  | 14            | 203 ± 5.6     | 13            | 227 ± 5.8     | 12            | 233 ± 9.2     |                |
|                            | Area (mm <sup>2</sup> ) | 14                      | 18.0 ± 6.8 | 14            | 18.4 ± 7.4    | 13            | 21.8 ± 7.2 *  | 12            | 21.5 ± 8.3    |                |
| Pigmented patches          | Lv1                     | Number                  | 14         | 64.6 ± 38.1   | 14            | 64.8 ± 33.0   | 13            | 71.2 ± 38.4   | 12            | 65.8 ± 36.1    |
|                            |                         | Area (mm <sup>2</sup> ) | 14         | 203.1 ± 114.7 | 14            | 174.9 ± 123.4 | 13            | 166.5 ± 91.4  | 12            | 163.1 ± 111.4  |
|                            | Lv2                     | Number                  | 14         | 13.1 ± 7.9    | 14            | 9.1 ± 7.0 #   | 13            | 10.8 ± 7.3    | 12            | 11.1 ± 7.3     |
|                            |                         | Area (mm <sup>2</sup> ) | 14         | 61.4 ± 63.6   | 14            | 28.1 ± 25.2   | 13            | 32.2 ± 22.2   | 12            | 29.5 ± 21.8    |
|                            | Lv3                     | Number                  | 14         | 4.8 ± 3.9     | 14            | 2.1 ± 2.4 ##  | 13            | 2.8 ± 2.2     | 12            | 2.7 ± 2.0 #    |
|                            |                         | Area (mm <sup>2</sup> ) | 14         | 30.4 ± 47.5   | 14            | 4.9 ± 4.9 ##  | 13            | 8.2 ± 7.4 #   | 12            | 6.3 ± 5.6 ##   |
| Redness                    | Lv3                     | Number                  | 14         | 3.9 ± 6.3     | 14            | 3.2 ± 8.1     | 13            | 2.7 ± 3.4     | 12            | 1.9 ± 4.5 #    |
|                            |                         | Area (mm <sup>2</sup> ) | 14         | 1.5 ± 2.5     | 14            | 0.8 ± 1.6     | 13            | 1.1 ± 2.4     | 12            | 0.4 ± 1.1      |
| FCP under 55 years old     |                         | N                       | Baseline   | N             | 1 month       | N             | 2 months      | N             | 3 months      |                |
| Pigmented macules          | Number                  | 13                      | 20.5 ± 6.7 | 13            | 17.8 ± 6.9    | 13            | 15.8 ± 5.0 ## | 11            | 17.3 ± 8.0    |                |
|                            | Area (mm <sup>2</sup> ) | 13                      | 17.0 ± 4.6 | 13            | 13.8 ± 4.0 ## | 13            | 14.8 ± 5.4    | 11            | 13.4 ± 4.7 ## |                |
| Pigmented patches          | Lv1                     | Number                  | 13         | 45.6 ± 14.8   | 13            | 44.4 ± 19.6   | 13            | 39.1 ± 10.9 # | 11            | 41.5 ± 14.1 ## |
|                            |                         | Area (mm <sup>2</sup> ) | 13         | 129.0 ± 80.5  | 13            | 106.2 ± 57.9  | 13            | 91.2 ± 36.6   | 11            | 82.3 ± 29.6 #  |
|                            | Lv2                     | Number                  | 13         | 7.2 ± 6.3     | 13            | 4.8 ± 3.9     | 13            | 4.6 ± 4.0     | 11            | 5.1 ± 3.4      |
|                            |                         | Area (mm <sup>2</sup> ) | 13         | 17.2 ± 16.5   | 13            | 11.8 ± 13.7   | 13            | 10.5 ± 11.8   | 11            | 11.3 ± 7.9     |
|                            | Lv3                     | Number                  | 13         | 3.1 ± 3.9     | 13            | 1.6 ± 2.2     | 13            | 1.0 ± 1.8 #   | 11            | 2.4 ± 2.6      |
|                            |                         | Area (mm <sup>2</sup> ) | 13         | 6.9 ± 9.8     | 13            | 3.8 ± 6.8     | 13            | 2.8 ± 6.4 #   | 11            | 5.7 ± 7.5      |
| Redness                    | Lv3                     | Number                  | 13         | 0.9 ± 1.4     | 13            | 2.2 ± 2.8     | 13            | 2.2 ± 2.9     | 11            | 0.6 ± 0.9      |
|                            |                         | Area (mm <sup>2</sup> ) | 13         | 0.8 ± 1.1     | 13            | 0.2 ± 0.4     | 13            | 2.1 ± 4.2     | 11            | 1.1 ± 2.1      |
| Placebo under 55 years old |                         | N                       | Baseline   | N             | 1 month       | N             | 2 months      | N             | 3 months      |                |
| Pigmented macules          | Number                  | 12                      | 18.0 ± 8.5 | 12            | 18.3 ± 9.7    | 12            | 16.5 ± 9.2    | 10            | 20.8 ± 7.7    |                |
|                            | Area (mm <sup>2</sup> ) | 12                      | 15.6 ± 8.2 | 12            | 14.5 ± 6.3    | 12            | 14.8 ± 5.5    | 10            | 14.4 ± 5.5    |                |
| Pigmented patches          | Lv1                     | Number                  | 12         | 47.8 ± 25.9   | 12            | 55.4 ± 31.3   | 12            | 52.5 ± 26.7   | 10            | 57.1 ± 21.0    |
|                            |                         | Area (mm <sup>2</sup> ) | 12         | 119.8 ± 79.2  | 12            | 137.1 ± 106.7 | 12            | 130.3 ± 133.9 | 10            | 217.0 ± 314.4  |
|                            | Lv2                     | Number                  | 12         | 8.8 ± 4.1     | 12            | 7.5 ± 5.8     | 12            | 6.8 ± 5.5     | 10            | 9.7 ± 7.6      |
|                            |                         | Area (mm <sup>2</sup> ) | 12         | 34.1 ± 36.4   | 12            | 25.5 ± 30.2   | 12            | 30.7 ± 48.7   | 10            | 95.9 ± 210.6   |
|                            | Lv3                     | Number                  | 12         | 4.5 ± 2.4     | 12            | 2.5 ± 2.3     | 12            | 2.3 ± 1.6     | 10            | 5.4 ± 5.1      |
|                            |                         | Area (mm <sup>2</sup> ) | 12         | 11.1 ± 10.3   | 12            | 4.8 ± 4.8     | 12            | 7.2 ± 10.3    | 10            | 37.0 ± 84.9    |
| Redness                    | Lv3                     | Number                  | 12         | 3.3 ± 3.9     | 12            | 4.6 ± 8.0     | 12            | 5.8 ± 7.6     | 10            | 2.9 ± 3.6      |
|                            |                         | Area (mm <sup>2</sup> ) | 12         | 2.3 ± 3.8     | 12            | 0.9 ± 2.5     | 12            | 1.5 ± 2.6     | 10            | 2.3 ± 4.1      |

Mean  $\pm$  standard deviation

Intergroup comparison: Tukey test by analysis of variance, \*  $P < 0.05$ , \*\*  $P < 0.01$  (vs. PL group)

Intragroup comparison: Wilcoxon signed-ranked test, #  $P < 0.05$ , ##  $P < 0.01$  (vs. baseline)

CP, collagen peptide; FCP, fermented collagen peptide; PL, placebo

Supplementary Material 4. Di- and tri-peptide compositions of CP and FCP

|                 | CP    | FCP   |
|-----------------|-------|-------|
| Pro-Hyp         | 8     | 14    |
| Hyp-Gly         | 3,447 | 2,942 |
| Ala-Hyp         | 73    | 0     |
| Ala-Hyp-Gly     | 436   | 306   |
| Glu-Hyp         | 82    | 0     |
| Glu-Hyp-Gly     | 4     | 3     |
| Phe-Hyp         | 203   | 16    |
| Gly-Ala         | 3,867 | 2,916 |
| Gly-Pro         | 2,379 | 3,431 |
| Gly-Pro-Hyp     | 36    | 4     |
| Leu-Pro/Ile-Pro | 81    | 1,682 |

Units: ppm
